# Supplementary material for: 緊急遮断弁 震災対策用機械式緊急遮断弁〈外部動力不要で地震発生時に流体を遮断する機械式緊急遮断弁〉
Source: Frontiers journal article supplement (doi:10.3389/fpls.2023.1276727), 2012-01-01
Supplement: Data_Sheet_2.PDF [file Data_Sheet_2.PDF]

Supplementary Data File 2

Tables 1-10

**Miriam M. Ferrer, Marylin Vázquez-Cruz, Tania Hernández-Hernández, Sara V. Good.**

**Geographical and life-history traits associated with low and high species richness across angiosperm families**

**Table S1.** Temporal periods according to the number of shifts + 1 according the median age for a shift in the speciation or extinction rate based on the five calibrated phylogenies: Wikström et al. (2001), Bell et al. (2010), Hernández-Hernández and Wiens (2020), Li et al. (2019), and Ramírez-Barahona et al. (2020).

| <b>Wikstrom et al. (2001)</b> | <b>Bell et al. (2010)</b> | <b>Hernández-Hernández and Wiens (2020)</b> | <b>Li et al. (2019)</b> | <b>Ramírez-Barahona et al. (2020)</b> |
|-------------------------------|---------------------------|---------------------------------------------|-------------------------|---------------------------------------|
| 0-43                          | 0-23                      | 0-14.4                                      | 0-24.49                 | 0-21                                  |
| 44-69                         | 24-38                     | 14.5-60                                     | 24.49-45                | 21.1-40                               |
| 70-92                         | 39-59                     | 60.1-86                                     | 45.1-60                 | 40.1-57.7                             |
| 93-120                        | 60-77                     | 86.1-104.2                                  | 60-200                  | 57.8-80                               |
| 121-132                       | 78-98                     | 104.3-117.8                                 |                         | 80.1-103                              |
|                               | 99-128                    | 117.9-130                                   |                         | 103.1-195.8                           |
|                               | 128-136                   |                                             |                         |                                       |

**Table S2.** Estimates for the parameters of a birth-death diversification model:  $\lambda$ ,  $\mu$ , (speciation and extinction rate), pSp (likelihood of the model), r (diversification rate) and  $\epsilon$  (extinction fraction  $\lambda/\mu$ ) obtained using a maximum likelihood approach (Bokma, 2003) for 432 angiosperm families (All) and those that were originated during different periods in which shifts on the diversification rates occurred based on their crown ages from five calibrated phylogenies: Wikström et al. (2001), Bell et al. (2010), Hernández-Hernández and Wiens (2020), Li et al. (2019), and Ramírez-Barahona et al. (2020) and the number of species from the APG website (Stevens, 2021).

| Period (MYBP)                 | $\lambda$ | $\mu$   | pSp       | r      | $\epsilon$ | Estimate |
|-------------------------------|-----------|---------|-----------|--------|------------|----------|
| <i>Wikström et al. (2001)</i> |           |         |           |        |            |          |
| <b>0-43</b>                   | 25.01     | 25.01   | -655.85   | 0.0001 | 1.0000     | MLE      |
| <b>0-43</b>                   | 18.63     | 18.62   | -656.85   | 0.0141 | 0.9992     | max      |
| <b>0-43</b>                   | 29.17     | 29.17   | -656.85   | 0.0001 | 1.0000     | min      |
| <b>44-69</b>                  | 14.69     | 14.69   | -1486.40  | 0.0001 | 1.0000     | MLE      |
| <b>44-69</b>                  | 13.11     | 13.11   | -1487.40  | 0.0009 | 0.9999     | max      |
| <b>44-69</b>                  | 16.31     | 16.31   | -1487.39  | 0.0001 | 1.0000     | min      |
| <b>70-92</b>                  | 6.14      | 6.14    | -785.83   | 0.0001 | 1.0000     | MLE      |
| <b>70-92</b>                  | 5.14      | 5.14    | -786.82   | 0.0029 | 0.9994     | max      |
| <b>70-92</b>                  | 7.04      | 7.04    | -786.81   | 0.0001 | 1.0000     | min      |
| <b>93-120</b>                 | 0.68      | 0.66    | -237.49   | 0.0199 | 0.9707     | MLE      |
| <b>92-120</b>                 | 0.55      | 0.53    | -238.48   | 0.0197 | 0.9642     | max      |
| <b>92-120</b>                 | 1.15      | 1.14    | -238.48   | 0.0131 | 0.9886     | min      |
| <b>121-132</b>                | 0.76      | 0.76    | -56.18    | 0.0001 | 0.9999     | MLE      |
| <b>121-132</b>                | 0.48      | 0.48    | -57.14    | 0.0009 | 0.9981     | max      |
| <b>121-132</b>                | 1.23      | 1.23    | -57.17    | 0.0001 | 0.9999     | min      |
| <b>All</b>                    | 13.16     | 13.1599 | -3324.593 | 0.0001 | 1.0000     | MLE      |
| <b>All</b>                    | 12.32     | 12.3199 | -3325.592 | 0.0001 | 1.0000     | max      |
| <b>All</b>                    | 14.11     | 14.1099 | -3325.59  | 0.0001 | 1.0000     | min      |
| <i>Bell et al. (2010)</i>     |           |         |           |        |            |          |
| <b>0-23</b>                   | 42.75     | 42.75   | -323.60   | 0.0001 | 1.0000     | MLE      |
| <b>0-23</b>                   | 30.75     | 30.73   | -324.60   | 0.0186 | 0.9994     | max      |
| <b>0-23</b>                   | 53.50     | 53.50   | -324.60   | 0.0001 | 1.0000     | min      |
| <b>24-38</b>                  | 25.20     | 25.20   | -600.21   | 0.0001 | 1.0000     | MLE      |
| <b>24-38</b>                  | 18.15     | 18.13   | -601.21   | 0.0157 | 0.9991     | max      |
| <b>24-38</b>                  | 29.75     | 29.75   | -601.20   | 0.0001 | 1.0000     | min      |
| <b>39-59</b>                  | 23.13     | 23.13   | -1058.84  | 0.0001 | 1.0000     | MLE      |
| <b>39-59</b>                  | 20.22     | 20.22   | -1059.84  | 0.0023 | 0.9999     | max      |
| <b>39-59</b>                  | 26.15     | 26.15   | -1059.82  | 0.0001 | 1.0000     | min      |
| <b>60-77</b>                  | 7.35      | 7.35    | -690.70   | 0.0001 | 1.0000     | MLE      |

|                                             |        |        |          |        |         |     |
|---------------------------------------------|--------|--------|----------|--------|---------|-----|
| <b>60-77</b>                                | 5.40   | 5.39   | -691.70  | 0.0079 | 0.9985  | max |
| <b>60-77</b>                                | 8.51   | 8.51   | -691.69  | 0.0001 | 1.0000  | min |
| <b>78-98</b>                                | 2.32   | 2.32   | -474.21  | 0.0001 | 1.0000  | MLE |
| <b>78-98</b>                                | 1.78   | 1.78   | -475.20  | 0.0047 | 0.9974  | max |
| <b>78-98</b>                                | 2.74   | 2.74   | -475.18  | 0.0001 | 1.0000  | min |
| <b>99-128</b>                               | 0.06   | 0.05   | -18.36   | 0.0109 | 0.8183  | MLE |
| <b>99-128</b>                               | 0.04   | 0.03   | -19.31   | 0.0091 | 0.7725  | max |
| <b>99-128</b>                               | 0.24   | 0.24   | -19.35   | 0.0003 | 0.9988  | min |
| <b>128-136</b>                              | 0.02   | 0.01   | -4.47    | 0.0057 | 0.6200  | MLE |
| <b>128-136</b>                              | 0.01   | 0.00   | -5.46    | 0.0059 | -0.1800 | max |
| <b>128-136</b>                              | 0.08   | 0.08   | -5.47    | 0.0001 | 0.9988  | min |
| <b>All</b>                                  | 17.85  | 17.85  | -3364.04 | 0.0001 | 1.0000  | MLE |
| <b>All</b>                                  | 16.70  | 16.70  | -3365.03 | 0.0001 | 1.0000  | max |
| <b>All</b>                                  | 19.13  | 19.13  | -3365.03 | 0.0001 | 1.0000  | min |
| <i>Hernández-Hernández and Wiens (2020)</i> |        |        |          |        |         |     |
| <b>0-14.4</b>                               | 132.60 | 132.60 | -24.03   | 0.0001 | 1.0000  | MLE |
| <b>0-14.4</b>                               | 29.90  | 29.60  | -25.03   | 0.2960 | 0.9901  | max |
| <b>0-14.4</b>                               | 343.20 | 343.20 | -25.03   | 0.0001 | 1.0000  | min |
| <b>14.5-60</b>                              | 16.15  | 16.15  | -1847.35 | 0.0001 | 1.0000  | MLE |
| <b>14.5-60</b>                              | 14.57  | 14.57  | -1848.34 | 0.0010 | 0.9999  | max |
| <b>14.5-60</b>                              | 17.66  | 17.66  | -1848.34 | 0.0001 | 1.0000  | min |
| <b>60.1-86</b>                              | 6.98   | 6.98   | -940.39  | 0.0047 | 0.9993  | MLE |
| <b>60.1-86</b>                              | 5.28   | 5.27   | -941.39  | 0.0120 | 0.9977  | max |
| <b>60.1-86</b>                              | 6.98   | 6.97   | -941.29  | 0.0079 | 0.9989  | min |
| <b>86.1-104.2</b>                           | 3.41   | 3.39   | -245.52  | 0.0250 | 0.9927  | MLE |
| <b>86.1-104.2</b>                           | 0.50   | 0.45   | -246.52  | 0.0516 | 0.8968  | max |
| <b>86.1-104.2</b>                           | 4.46   | 4.44   | -246.52  | 0.0250 | 0.9944  | min |
| <b>104.3-117.8</b>                          | 4.34   | 4.33   | -112.72  | 0.0060 | 0.9986  | MLE |
| <b>104.3-117.8</b>                          | 3.08   | 3.07   | -113.71  | 0.0060 | 0.9981  | max |
| <b>104.3-117.8</b>                          | 8.48   | 8.48   | -113.71  | 0.0010 | 0.9999  | min |
| <b>117.9-130</b>                            | 0.28   | 0.28   | -45.59   | 0.0001 | 0.9996  | MLE |
| <b>117.9-130</b>                            | 0.18   | 0.18   | -46.55   | 0.0007 | 0.9961  | max |
| <b>117.9-130</b>                            | 0.46   | 0.46   | -46.59   | 0.0001 | 0.9998  | min |
| <b>All</b>                                  | 13.75  | 13.75  | -3290.04 | 0.0001 | 1.0000  | MLE |
| <b>All</b>                                  | 12.86  | 12.86  | -3291.04 | 0.0001 | 1.0000  | max |
| <b>All</b>                                  | 14.73  | 14.73  | -3291.04 | 0.0001 | 1.0000  | min |
| <i>Li et al. (2019)</i>                     |        |        |          |        |         |     |
| <b>0-24.49</b>                              | 0.21   | 0.14   | -4.09    | 0.0680 | 0.6762  | MLE |
| <b>0-24.49</b>                              | 0.07   | 0.01   | -5.08    | 0.0600 | 0.1429  | max |
| <b>0-24.49</b>                              | 1.13   | 1.13   | -5.09    | 0.0019 | 0.9983  | min |

|                                       |       |         |           |        |        |     |
|---------------------------------------|-------|---------|-----------|--------|--------|-----|
| <b>24.49-45</b>                       | 13.44 | 13.44   | -554.35   | 0.0001 | 1.0000 | MLE |
| <b>24.49-45</b>                       | 9.10  | 9.08    | -555.35   | 0.0210 | 0.9977 | max |
| <b>24.49-45</b>                       | 15.82 | 15.82   | -555.34   | 0.0001 | 1.0000 | min |
| <b>45.1-60</b>                        | 9.46  | 9.46    | -469.78   | 0.0010 | 0.9999 | MLE |
| <b>45.1-60</b>                        | 2.42  | 2.38    | -470.78   | 0.0450 | 0.9814 | max |
| <b>45.1-60</b>                        | 11.32 | 11.32   | -470.77   | 0.0010 | 0.9999 | min |
| <b>60-200</b>                         | 9.32  | 9.32    | -2205.28  | 0.0001 | 1.0000 | MLE |
| <b>60-200</b>                         | 8.54  | 8.54    | -2206.27  | 0.0007 | 0.9999 | max |
| <b>60-200</b>                         | 10.15 | 10.15   | -2206.27  | 0.0001 | 1.0000 | min |
| <b>All</b>                            | 10.08 | 10.0799 | -3242.63  | 0.0001 | 1.0000 | MLE |
| <b>All</b>                            | 9.44  | 9.4399  | -3243.576 | 0.0001 | 1.0000 | MAX |
| <b>All</b>                            | 10.78 | 10.7799 | -3243.589 | 0.0001 | 1.0000 | MIN |
| <i>Ramírez-Barahona et al. (2020)</i> |       |         |           |        |        |     |
| <b>0-21</b>                           | 1.86  | 1.83    | -324.89   | 0.0299 | 0.9839 | MLE |
| <b>0-21</b>                           | 1.59  | 1.56    | -325.89   | 0.0293 | 0.9816 | max |
| <b>0-21</b>                           | 2.50  | 2.50    | -325.89   | 0.0001 | 1.0000 | min |
| <b>21.1-40</b>                        | 4.14  | 4.14    | -600.92   | 0.0001 | 1.0000 | MLE |
| <b>21.1-40</b>                        | 2.62  | 2.59    | -601.91   | 0.0270 | 0.9897 | max |
| <b>21.1-40</b>                        | 4.77  | 4.77    | -601.90   | 0.0001 | 1.0000 | min |
| <b>40.1-57.7</b>                      | 9.27  | 9.27    | -699.28   | 0.0001 | 1.0000 | MLE |
| <b>40.1-57.7</b>                      | 5.36  | 5.34    | -700.27   | 0.0190 | 0.9965 | max |
| <b>40.1-57.7</b>                      | 10.73 | 10.73   | -700.27   | 0.0001 | 1.0000 | min |
| <b>57.8-80</b>                        | 19.15 | 19.15   | -955.46   | 0.0001 | 1.0000 | MLE |
| <b>57.8-80</b>                        | 13.31 | 13.30   | -956.46   | 0.0090 | 0.9993 | max |
| <b>57.8-80</b>                        | 21.86 | 21.86   | -956.46   | 0.0001 | 1.0000 | min |
| <b>80.1-103</b>                       | 0.09  | 0.00    | -196.85   | 0.0860 | 0.0444 | MLE |
| <b>80.1-103</b>                       | 0.09  | 0.00    | -197.40   | 0.0840 | 0.0118 | max |
| <b>80.1-103</b>                       | 4.05  | 4.02    | -197.84   | 0.0330 | 0.9919 | min |
| <b>103.1-195.8</b>                    | 18.91 | 18.91   | -132.10   | 0.0001 | 1.0000 | MLE |
| <b>103.1-195.8</b>                    | 12.47 | 12.47   | -133.10   | 0.0050 | 0.9996 | max |
| <b>103.1-195.8</b>                    | 27.91 | 27.91   | -133.10   | 0.0001 | 1.0000 | min |
| <b>All</b>                            | 2.73  | 2.69    | -2961.33  | 0.0400 | 0.9853 | MLE |
| <b>All</b>                            | 2.48  | 2.44    | -2963.32  | 0.0400 | 0.9839 | max |
| <b>All</b>                            | 3.00  | 2.96    | -2963.24  | 0.0400 | 0.9867 | min |

MLE: maximum likelihood estimate, max: maximum value of r, min: minimum value of r

**Table S3.** Estimates for the parameters of a birth-death diversification model:  $\lambda$ ,  $\mu$ , (speciation and extinction rate), pSp (likelihood of the model), r (diversification rate) and  $\varepsilon$  (extinction fraction  $\lambda/\mu$ ) obtained using a maximum likelihood approach (Bokma, 2003) for all angiosperm families and those that were originated during different periods in which shifts on the diversification rates occurred based on their crown ages from five calibrated phylogenies: Wikström et al. (2001), Bell et al. (2010), Hernández-Hernández and Wiens (2020), Li et al. (2019), and Ramírez-Barahona et al. (2020) and the number of species from the APG website (Stevens, 2021).

| Period (MYBP)               | $\lambda$ | $\mu$ | pSp      | r      | $\varepsilon$ | Estimate |
|-----------------------------|-----------|-------|----------|--------|---------------|----------|
| <i>Wikström et al. 2001</i> |           |       |          |        |               |          |
| <b>0-43</b>                 | 36.90     | 36.90 | -455.39  | 0.0001 | 1.0000        | MLE      |
| <b>0-43</b>                 | 27.00     | 26.99 | -456.39  | 0.0145 | 0.9995        | max      |
| <b>0-43</b>                 | 45.08     | 45.08 | -456.39  | 0.0001 | 1.0000        | min      |
| <b>44-69</b>                | 19.56     | 19.56 | -1098.34 | 0.0001 | 1.0000        | MLE      |
| <b>44-69</b>                | 16.66     | 16.66 | -1099.34 | 0.0019 | 0.9999        | max      |
| <b>44-69</b>                | 22.10     | 22.10 | -1099.33 | 0.0001 | 1.0000        | min      |
| <b>70-92</b>                | 9.40      | 9.40  | -496.53  | 0.0001 | 1.0000        | MLE      |
| <b>70-92</b>                | 7.44      | 7.44  | -497.52  | 0.0029 | 0.9996        | max      |
| <b>70-92</b>                | 11.24     | 11.24 | -497.51  | 0.0001 | 1.0000        | min      |
| <b>93-120</b>               | 0.50      | 0.47  | -186.02  | 0.0280 | 0.9440        | MLE      |
| <b>92-120</b>               | 0.50      | 0.48  | -186.85  | 0.0250 | 0.9500        | max      |
| <b>92-120</b>               | 0.97      | 0.95  | -187.02  | 0.0190 | 0.9804        | min      |
| <b>121-132</b>              | 0.76      | 0.76  | -56.18   | 0.0001 | 0.9999        | MLE      |
| <b>121-132</b>              | 0.48      | 0.48  | -57.14   | 0.0009 | 0.9981        | max      |
| <b>121-132</b>              | 1.23      | 1.23  | -57.17   | 0.0001 | 0.9999        | min      |
| <b>All</b>                  | 18.42     | 18.42 | -2374.21 | 0.0001 | 1.0000        | MLE      |
| <b>All</b>                  | 17.00     | 17.00 | -2375.21 | 0.0001 | 1.0000        | max      |
| <b>All</b>                  | 20.04     | 20.04 | -2375.21 | 0.0001 | 1.0000        | min      |
| <i>Bell et al. 2010</i>     |           |       |          |        |               |          |
| <b>0-23</b>                 | 34.90     | 34.88 | -277.05  | 0.0201 | 0.9994        | MLE      |
| <b>0-23</b>                 | 33.76     | 33.74 | -277.05  | 0.0246 | 0.9993        | max      |
| <b>0-23</b>                 | 65.20     | 65.20 | -277.04  | 0.0001 | 1.0000        | min      |
| <b>24-38</b>                | 30.35     | 30.35 | -431.94  | 0.0001 | 1.0000        | MLE      |
| <b>24-38</b>                | 21.30     | 21.28 | -432.94  | 0.0156 | 0.9993        | max      |
| <b>24-38</b>                | 36.90     | 36.90 | -432.94  | 0.0001 | 1.0000        | min      |
| <b>39-59</b>                | 32.95     | 32.95 | -735.73  | 0.0001 | 1.0000        | MLE      |
| <b>39-59</b>                | 26.85     | 26.84 | -736.72  | 0.0060 | 0.9998        | max      |
| <b>39-59</b>                | 38.50     | 38.50 | -736.72  | 0.0001 | 1.0000        | min      |
| <b>60-77</b>                | 4.20      | 4.20  | -256.03  | 0.0001 | 1.0000        | MLE      |

|                                             |        |        |          |        |        |     |
|---------------------------------------------|--------|--------|----------|--------|--------|-----|
| <b>60-77</b>                                | 2.85   | 2.84   | -256.97  | 0.0071 | 0.9975 | max |
| <b>60-77</b>                                | 5.34   | 5.34   | -257.02  | 0.0001 | 1.0000 | min |
| <b>78-98</b>                                | 8.65   | 8.65   | -449.16  | 0.0001 | 1.0000 | MLE |
| <b>78-98</b>                                | 5.45   | 5.44   | -450.11  | 0.0091 | 0.9983 | max |
| <b>78-98</b>                                | 10.45  | 10.45  | -450.16  | 0.0001 | 1.0000 | min |
| <b>99-128</b>                               | 0.03   | 0.01   | -18.13   | 0.0209 | 0.3033 | MLE |
| <b>99-128</b>                               | 0.02   | 0.00   | -19.10   | 0.0183 | 0.0850 | max |
| <b>99-128</b>                               | 0.21   | 0.21   | -19.11   | 0.0007 | 0.9967 | min |
| <b>128-136</b>                              | 0.06   | 0.05   | -18.36   | 0.0109 | 0.8183 | MLE |
| <b>128-136</b>                              | 0.04   | 0.03   | -19.31   | 0.0091 | 0.7725 | max |
| <b>128-136</b>                              | 0.24   | 0.24   | -19.35   | 0.0003 | 0.9988 | min |
| <b>All</b>                                  | 25.64  | 25.64  | -2358.64 | 0.0001 | 1.0000 | MLE |
| <b>All</b>                                  | 23.64  | 23.64  | -2359.63 | 0.0001 | 1.0000 | max |
| <b>All</b>                                  | 27.88  | 27.88  | -2359.63 | 0.0001 | 1.0000 | min |
| <i>Hernández-Hernández and Wiens (2020)</i> |        |        |          |        |        |     |
| <b>0-14.4</b>                               | 132.60 | 132.60 | -24.03   | 0.0001 | 1.0000 | MLE |
| <b>0-14.4</b>                               | 29.90  | 29.60  | -25.03   | 0.2960 | 0.9901 | max |
| <b>0-14.4</b>                               | 343.20 | 343.20 | -25.03   | 0.0001 | 1.0000 | min |
| <b>14.5-60</b>                              | 16.88  | 16.88  | -1763.70 | 0.0001 | 1.0000 | MLE |
| <b>14.5-60</b>                              | 15.10  | 15.10  | -1764.69 | 0.0021 | 0.9999 | max |
| <b>14.5-60</b>                              | 18.58  | 18.58  | -1764.68 | 0.0001 | 1.0000 | min |
| <b>60.1-86</b>                              | 9.54   | 9.54   | -824.76  | 0.0001 | 1.0000 | MLE |
| <b>60.1-86</b>                              | 6.24   | 6.23   | -825.75  | 0.0111 | 0.9982 | max |
| <b>60.1-86</b>                              | 10.96  | 10.96  | -825.76  | 0.0001 | 1.0000 | min |
| <b>86.1-104.2</b>                           | 3.41   | 3.39   | -245.52  | 0.0250 | 0.9927 | MLE |
| <b>86.1-104.2</b>                           | 0.50   | 0.45   | -246.52  | 0.0516 | 0.8968 | max |
| <b>86.1-104.2</b>                           | 4.46   | 4.44   | -246.52  | 0.0250 | 0.9944 | min |
| <b>104.3-117.8</b>                          | 4.34   | 4.33   | -112.72  | 0.0060 | 0.9986 | MLE |
| <b>104.3-117.8</b>                          | 3.08   | 3.07   | -113.71  | 0.0060 | 0.9981 | max |
| <b>104.3-117.8</b>                          | 8.48   | 8.48   | -113.71  | 0.0010 | 0.9999 | min |
| <b>117.9-130</b>                            | 0.28   | 0.28   | -45.59   | 0.0001 | 0.9996 | MLE |
| <b>117.9-130</b>                            | 0.18   | 0.18   | -46.55   | 0.0007 | 0.9961 | max |
| <b>117.9-130</b>                            | 0.46   | 0.46   | -46.59   | 0.0001 | 0.9998 | min |
| <b>All</b>                                  | 14.70  | 14.70  | -3072.72 | 0.0001 | 1.0000 | MLE |
| <b>All</b>                                  | 13.72  | 13.72  | -3073.68 | 0.0001 | 1.0000 | max |
| <b>All</b>                                  | 15.76  | 15.76  | -3073.68 | 0.0001 | 1.0000 | min |
| <i>LI et al. 2019</i>                       |        |        |          |        |        |     |
| <b>0-24.49</b>                              | 0.21   | 0.14   | -4.09    | 0.0680 | 0.6762 | MLE |
| <b>0-24.49</b>                              | 0.07   | 0.01   | -5.08    | 0.0600 | 0.1429 | max |
| <b>0-24.49</b>                              | 1.13   | 1.13   | -5.09    | 0.0019 | 0.9983 | min |

|                                     |       |       |          |        |        |     |
|-------------------------------------|-------|-------|----------|--------|--------|-----|
| <b>24.49-45</b>                     | 15.44 | 15.44 | -494.13  | 0.0001 | 1.0000 | MLE |
| <b>24.49-45</b>                     | 12.00 | 11.99 | -495.01  | 0.0090 | 0.9993 | max |
| <b>24.49-45</b>                     | 18.36 | 18.36 | -495.13  | 0.0001 | 1.0000 | min |
| <b>45.1-60</b>                      | 10.64 | 10.64 | -431.73  | 0.0001 | 1.0000 | MLE |
| <b>45.1-60</b>                      | 2.12  | 2.07  | -432.69  | 0.0490 | 0.9769 | max |
| <b>45.1-60</b>                      | 12.86 | 12.86 | -432.73  | 0.0001 | 1.0000 | min |
| <b>60-200</b>                       | 11.82 | 11.82 | -1766.56 | 0.0001 | 1.0000 | MLE |
| <b>60-200</b>                       | 10.68 | 10.68 | -1767.55 | 0.0007 | 0.9999 | max |
| <b>60-200</b>                       | 12.98 | 12.98 | -1767.53 | 0.0001 | 1.0000 | min |
| <b>All</b>                          | 12.26 | 12.26 | -2704.21 | 0.0001 | 1.0000 | MLE |
| <b>All</b>                          | 11.36 | 11.36 | -2705.20 | 0.0001 | 1.0000 | MAX |
| <b>All</b>                          | 13.20 | 13.20 | -2705.20 | 0.0001 | 1.0000 | MIN |
| <i>Ramírez-Barahona et al. 2020</i> |       |       |          |        |        |     |
| <b>0-21</b>                         | 2.08  | 2.05  | -269.07  | 0.0291 | 0.9860 | MLE |
| <b>0-21</b>                         | 1.74  | 1.71  | -270.01  | 0.0291 | 0.9833 | max |
| <b>0-21</b>                         | 2.60  | 2.59  | -270.07  | 0.0131 | 0.9950 | min |
| <b>21.1-40</b>                      | 4.88  | 4.88  | -521.83  | 0.0001 | 1.0000 | MLE |
| <b>21.1-40</b>                      | 3.72  | 3.71  | -522.80  | 0.0091 | 0.9976 | max |
| <b>21.1-40</b>                      | 5.70  | 5.70  | -522.81  | 0.0001 | 1.0000 | min |
| <b>40.1-57.7</b>                    | 9.98  | 9.98  | -655.34  | 0.0001 | 1.0000 | MLE |
| <b>40.1-57.7</b>                    | 8.50  | 8.50  | -656.34  | 0.0007 | 0.9999 | max |
| <b>40.1-57.7</b>                    | 10.73 | 10.73 | -700.27  | 0.0001 | 1.0000 | min |
| <b>57.8-80</b>                      | 22.22 | 22.22 | -831.60  | 0.0001 | 1.0000 | MLE |
| <b>57.8-80</b>                      | 18.60 | 18.60 | -832.59  | 0.0015 | 0.9999 | max |
| <b>57.8-80</b>                      | 25.65 | 25.65 | -832.60  | 0.0001 | 1.0000 | min |
| <b>80.1-103</b>                     | 0.97  | 0.91  | -167.34  | 0.0560 | 0.9423 | MLE |
| <b>80.1-103</b>                     | 0.09  | 0.00  | -167.83  | 0.0860 | 0.0444 | max |
| <b>80.1-103</b>                     | 14.99 | 14.97 | -167.70  | 0.0151 | 0.9990 | min |
| <b>103.1-195.8</b>                  | 21.70 | 21.70 | -116.53  | 0.0001 | 1.0000 | MLE |
| <b>103.1-195.8</b>                  | 14.42 | 14.42 | -117.53  | 0.0017 | 0.9999 | max |
| <b>103.1-195.8</b>                  | 33.08 | 33.08 | -117.53  | 0.0001 | 1.0000 | min |
| <b>All</b>                          | 5.12  | 5.09  | -2606.94 | 0.0251 | 0.9951 | MLE |
| <b>All</b>                          | 4.78  | 4.75  | -2607.83 | 0.0251 | 0.9947 | max |
| <b>All</b>                          | 5.68  | 5.65  | -2608.88 | 0.0251 | 0.9956 | min |

MLE: maximum likelihood estimate, max: maximum value of r, min: minimum value of r



**Table S4.** Frequency of families with poor, predicted, high or mixed species richness based on strict consensus across five datasets and tabulated by the number of species in the family. Results are presented for 432 angiosperm families by estimating the crown age of families using the age of their sister family (upper panel) or for the 235 angiosperm families that were included in all five calibrated phylogenies included in our study (lower panel).

| <b>Species richness</b> | <b>1</b>                                                                    | <b>2-10</b> | <b>11-100</b> | <b>101-500</b> | <b>501-1000</b> | <b>1001-5000</b> | <b>5001-26000</b> | <b>Total</b> |
|-------------------------|-----------------------------------------------------------------------------|-------------|---------------|----------------|-----------------|------------------|-------------------|--------------|
|                         | <i>Families with crown ages inferred from sister clade strict consensus</i> |             |               |                |                 |                  |                   |              |
| <b>unclear</b>          |                                                                             |             | 4             |                |                 |                  |                   | 4            |
| <b>poor</b>             | 32                                                                          | 42          | 1             |                |                 |                  |                   | 75           |
| <b>predicted</b>        |                                                                             | 64          | 117           | 75             | 36              | 49               |                   | 341          |
| <b>high</b>             |                                                                             |             |               |                |                 | 3                | 9                 | 12           |
| <b>Total</b>            | 32                                                                          | 106         | 122           | 75             | 36              | 52               | 9                 | 432          |
|                         | <i>Families with crown ages in common across all studies</i>                |             |               |                |                 |                  |                   |              |
| <b>poor</b>             | 3                                                                           | 15          | 1             |                |                 |                  |                   | 19           |
| <b>predicted</b>        |                                                                             | 20          | 56            | 53             | 31              | 46               |                   | 206          |
| <b>high</b>             |                                                                             |             |               |                |                 | 1                | 9                 | 10           |
| <b>Total</b>            | 3                                                                           | 35          | 57            | 53             | 31              | 47               | 9                 | 235          |

**Table S5.** Frequencies of the 432 angiosperm families that were originated during different periods in which shifts on the diversification rates occurred based on their crown ages from five datasets: Wikström et al. (2001), Bell et al. (2010), Hernández-Hernández and Wiens (2020), Li et al. (2019), and Ramírez-Barahona et al. (2020), grouped by the different periods in which shifts on the diversification rates occur. Statistics for a  $\chi^2$  independence test are presented, and periods in which more families were found for any of the three classes are presented in red, and those in which less families were found are in blue according to a Haberman residual analysis.

| Period (MYBP)                                          | high | low | predicted | Total |
|--------------------------------------------------------|------|-----|-----------|-------|
| Wikström ( $\chi^2 = 6.74$ , $P = 0.5647$ )            |      |     |           |       |
| 0-43                                                   | 7    | 33  | 45        | 85    |
| 44-69                                                  | 11   | 79  | 102       | 192   |
| 70-92                                                  | 8    | 47  | 54        | 109   |
| 92-120                                                 | 3    | 9   | 24        | 36    |
| 120-158                                                | 1    | 6   | 3         | 10    |
| Total                                                  | 30   | 174 | 228       | 432   |
| Bell ( $\chi^2 = 62.97$ , $P < 0.0001$ )               |      |     |           |       |
| 0-23                                                   | 4    | 12  | 19        | 35    |
| 24-38                                                  | 6    | 17  | 46        | 69    |
| 39-59                                                  | 8    | 59  | 72        | 139   |
| 59-77                                                  | 2    | 34  | 47        | 83    |
| 78-98                                                  | 4    | 26  | 38        | 68    |
| 99-128                                                 | 14   | 1   | 20        | 35    |
| 129-136                                                | 0    | 1   | 2         | 3     |
| Total                                                  | 38   | 150 | 244       | 432   |
| Hernández-Hernández ( $\chi^2 = 5.11$ , $P = 0.7788$ ) |      |     |           |       |
| 0-14.4                                                 | 0    | 1   | 2         | 3     |
| 14.5-60                                                | 17   | 98  | 132       | 247   |
| 60.1-86                                                | 9    | 46  | 72        | 127   |
| 86.1-104.2                                             | 1    | 15  | 14        | 30    |
| 104.3-117.8                                            | 2    | 5   | 8         | 15    |
| 117.9-130                                              | 1    | 2   | 7         | 10    |
| Total                                                  | 30   | 167 | 235       | 432   |
| Li ( $\chi^2 = 4.87$ , $P = 0.7712$ )                  |      |     |           |       |
| 0-22.4                                                 | 0    | 0   | 2         | 2     |
| 22-5-45-9                                              | 6    | 31  | 41        | 78    |
| 46-59.9                                                | 6    | 21  | 38        | 65    |
| 60-200                                                 | 14   | 116 | 157       | 287   |
| Total                                                  | 26   | 168 | 238       | 432   |

| Ramírez-Barahona ( $\chi^2 = 18.71$ , P = 0.0430) |    |     |     |     |
|---------------------------------------------------|----|-----|-----|-----|
| 0-21                                              | 8  | 15  | 53  | 76  |
| 21.1-40                                           | 5  | 26  | 72  | 103 |
| 40.1-57.7                                         | 6  | 23  | 69  | 98  |
| 57.8-80                                           | 7  | 29  | 81  | 117 |
| 80.1-103                                          | 2  | 8   | 13  | 23  |
| 103.1-196                                         | 1  | 10  | 4   | 15  |
| Total                                             | 29 | 111 | 292 | 432 |

**Table S6.** Frequencies of the angiosperm families that were originated during different periods in which shifts on the diversification rates occurred based on their crown ages from five calibrated phylogenies: Wikström et al. (2001), Bell et al. (2010), Hernández-Hernández and Wiens (2020), Li et al. (2019), and Ramírez-Barahona et al. (2020), grouped by the different periods in which shifts on the diversification rates occur. Statistics for a  $\chi^2$  independence test are presented, and periods in which more families were found for any of the three classes are presented in red, and those in which less families were found are in blue according to a Haberman residual analysis.

| Period (MYBP)                                                                | high | low | predicted | Total |
|------------------------------------------------------------------------------|------|-----|-----------|-------|
| <i>Wikström et al. 2001</i><br>( $\chi^2 = 11.1474$ , P = 0.1941)            |      |     |           |       |
| 0-43                                                                         | 5    | 11  | 40        | 56    |
| 44-69                                                                        | 9    | 46  | 82        | 137   |
| 70-92                                                                        | 5    | 25  | 35        | 65    |
| 93-120                                                                       | 2    | 6   | 20        | 28    |
| 121-158                                                                      | 1    | 6   | 3         | 10    |
| Total                                                                        | 22   | 94  | 180       | 286   |
| <i>Bell et al. 2010</i><br>( $\chi^2 = 32.46$ , P < 0.0012)                  |      |     |           |       |
| 0-23                                                                         | 4    | 6   | 18        | 28    |
| 24-38                                                                        | 6    | 12  | 41        | 59    |
| 39-59                                                                        | 4    | 29  | 60        | 93    |
| 60-77                                                                        | 9    | 12  | 38        | 59    |
| 78-98                                                                        | 2    | 15  | 19        | 36    |
| 99-128                                                                       | 7    | 1   | 8         | 16    |
| 129-136                                                                      | 0    | 1   | 1         | 2     |
| Total                                                                        | 32   | 76  | 185       | 293   |
| <i>Hernández-Hernández and Wiens 2020</i><br>( $\chi^2 = 4.59$ , P = 0.9292) |      |     |           |       |
| 0-14.4                                                                       | 0    | 1   | 2         | 3     |
| 14.5-60                                                                      | 17   | 92  | 125       | 234   |
| 60.1-86                                                                      | 8    | 43  | 59        | 110   |
| 86.1-104.2                                                                   | 1    | 15  | 14        | 30    |
| 104.3-117.8                                                                  | 2    | 5   | 8         | 15    |
| 117.9-130                                                                    | 1    | 2   | 7         | 10    |
| Total                                                                        | 29   | 158 | 215       | 402   |
| <i>Li et al. 2019</i><br>( $\chi^2 = 3.01$ , P = 0.8080)                     |      |     |           |       |
| 0-22.4                                                                       | 0    | 0   | 2         | 2     |

|                                                                       |    |     |     |     |
|-----------------------------------------------------------------------|----|-----|-----|-----|
| <b>22-5-45-9</b>                                                      | 6  | 24  | 38  | 68  |
| <b>46-59.9</b>                                                        | 5  | 17  | 37  | 59  |
| <b>60-200</b>                                                         | 13 | 75  | 135 | 223 |
| <b>Total</b>                                                          | 24 | 116 | 212 | 352 |
| <i>Ramírez-Barahona et al. 2020</i><br>$(\chi^2 = 18.71, P = 0.0430)$ |    |     |     |     |
| <b>0-21</b>                                                           | 6  | 7   | 48  | 61  |
| <b>21.1-40</b>                                                        | 5  | 15  | 67  | 87  |
| <b>40.1-57.7</b>                                                      | 6  | 17  | 67  | 90  |
| <b>57.8-80</b>                                                        | 6  | 16  | 78  | 100 |
| <b>80.1-103</b>                                                       | 2  | 6   | 11  | 19  |
| <b>103.1-196</b>                                                      | 1  | 9   | 3   | 13  |
| <b>Total</b>                                                          | 26 | 70  | 274 | 370 |

**Table S7.** Frequency of 248 families with poor, predicted, or high species richness based on strict consensus tabulated by the absence or presence of fleshy fruits (Vamosi and Vamosi, 2011). Statistics for a  $\chi^2$  independence test are presented, and categories in which more families were found for any of the three classes are presented in red, and those in which less families were found are in blue according to a Haberman residual analysis.

| <b>Fleshy fruit</b>              | <b>poor</b> | <b>predicted</b> | <b>high</b> | <b>Total</b> |
|----------------------------------|-------------|------------------|-------------|--------------|
| $(\chi^2 = 0.08082, P = 0.6676)$ |             |                  |             |              |
| <b>absent</b>                    | 28          | 54               | 3           | 85           |
| <b>present</b>                   | 47          | 107              | 9           | 163          |
| <b>Total</b>                     | 75          | 161              | 12          | 248          |

**Table S8.** Frequency of 248 families with poor, predicted, or high species richness based on strict consensus tabulated by the absence or presence of different perianth symmetries (Reyes et al., 2016). Statistics for a  $\chi^2$  independence test are presented, and categories in which more families were found for any of the three classes are presented in red, and those in which less families were found are in blue according to a Haberman residual analysis.

| Floral symmetry                | poor | predicted | high | Total |
|--------------------------------|------|-----------|------|-------|
| $(\chi^2 = 35.91, P < 0.0047)$ |      |           |      |       |
| Zygomorphic                    | 6    | 57        | 9    | 72    |
| Polysymmetric                  | 56   | 128       | 9    | 193   |
| Actinomorphic                  | 2    | 6         | 1    | 9     |
| Spiral                         | 7    | 3         | 0    | 10    |
| Disymmetric                    | 2    | 1         | 1    | 4     |
| Asymmetric                     |      | 1         |      | 1     |
| Perianthless                   | 2    | 4         |      | 6     |
| Monosymmetric by reduction     | 3    | 1         | 1    | 5     |
| Total                          | 78   | 201       | 21   | 300   |

**Table S9.** Frequency of self-incompatibility system in 248 families with poor, predicted, or high species richness based on strict consensus tabulated by self-incompatibility type. Statistics for a  $\chi^2$  independence test are presented, and categories in which more families were found for any of the three classes are presented in red, and those in which fewer families were found are in blue according to a Haberman residual analysis.

| Type of SI                     | poor | predicted | high | Total general |
|--------------------------------|------|-----------|------|---------------|
| $(\chi^2 = 14.23, P = 0.0499)$ |      |           |      |               |
| Stigmatic                      | 2    | 7         | 4    | 13            |
| Stylar                         | 0    | 12        | 3    | 15            |
| Late acting                    | 0    | 14        | 1    | 15            |
| Polymorphic                    | 0    | 8         | 1    | 9             |
| SS_unclass                     | 5    | 39        | 0    | 44            |
| Homomorphic+Het                | 0    | 12        | 3    | 15            |
| SS_unclass+Het                 | 0    | 4         | 0    | 4             |
| Self-compatibility             | 8    | 26        | 0    | 34            |
| Total                          | 15   | 122       | 12   | 149           |

Stigmatic: self-incompatibility reaction occurs in stigma, Stylar: self-incompatibility reaction occurs in style, Late acting: self-incompatibility reaction occurs after pollen tube enters the ovary, POL: self-incompatibility reaction occurs in stigma, SS\_unclass: self-sterility unclassified; Heterostyly present in the famili.

**Table S10.** Frequency of 248 families with poor, predicted, or high species richness based on strict consensus tabulated by distribution range. Statistics for a  $\chi^2$  independence test are presented, and categories in which more families were found for any of the three classes are presented in red, and those in which fewer families were found are in blue according to a Haberman residual analysis.

| Distribution range              | poor | predicted | high | Total |
|---------------------------------|------|-----------|------|-------|
| $(\chi^2 = 238.67, P < 0.0001)$ |      |           |      |       |
| Highly localized                | 20   | 1         | 0    | 21    |
| Localized                       | 47   | 38        | 0    | 85    |
| Widespread                      | 8    | 119       | 3    | 130   |
| Cosmopolitan                    | 0    | 3         | 9    | 12    |
| Total                           | 75   | 161       | 12   | 248   |

**Table S11.** Frequency of 248 families with poor, predicted, or high species richness based on strict consensus tabulated by distribution pattern. Statistics for a  $\chi^2$  independence test are presented, and categories in which more families were found for any of the three classes are presented in red, and those in which less families were found are in blue according to a Haberman residual analysis.

| Distribution pattern          | poor | predicted | high | Total |
|-------------------------------|------|-----------|------|-------|
| $(\chi^2 = 6.47, P = 0.0393)$ |      |           |      |       |
| Continuous                    | 48   | 104       | 12   | 164   |
| Disjunct                      | 27   | 57        | 0    | 84    |
| Total                         | 75   | 161       | 12   | 248   |



**Table S12.** Frequency of 248 families with poor, predicted, or high species richness based on strict consensus tabulated by realm number. Statistics for a  $\chi^2$  independence test are presented, and categories in which more families were found for any of the three classes are presented in red, and those in which less families were found are in blue according to a Haberman residual analysis.

| Realm number                    | poor | predicted | high | Total |
|---------------------------------|------|-----------|------|-------|
| $(\chi^2 = 234.59, P < 0.0001)$ |      |           |      |       |
| 1                               | 39   | 7         | 0    | 46    |
| 2 to 4                          | 32   | 41        | 0    | 73    |
| 5 to 7                          | 4    | 113       | 6    | 123   |
| 8                               | 0    | 0         | 6    | 6     |
| Total                           | 75   | 161       | 12   | 248   |

**Table S13.** Frequency of 248 families with poor, predicted, or high species richness based on strict consensus tabulated by realm presence. Statistics for a  $\chi^2$  independence test are presented, and categories in which more families were found for any of the three classes are presented in red, and those in which less families were found are in blue according to a Haberman residual analysis.

| Realm                          | poor | predicted | high | Total |
|--------------------------------|------|-----------|------|-------|
| $(\chi^2 = 81.68, P < 0.0001)$ |      |           |      |       |
| Afrotropic                     | 24   | 127       | 12   | 163   |
| Antartic                       | 0    | 0         | 6    | 6     |
| Australasia                    | 25   | 121       | 12   | 158   |
| Indomalayan                    | 23   | 136       | 12   | 171   |
| Nearctic                       | 12   | 121       | 12   | 145   |
| Neotropic                      | 32   | 142       | 12   | 186   |
| Oceania                        | 4    | 81        | 12   | 97    |
| Palearctic                     | 20   | 117       | 12   | 149   |
| Total                          | 140  | 845       | 90   | 1075  |

**Table S14.** Frequency of 248 families with poor, predicted, or high species richness based on strict consensus tabulated by primary realm presence. Statistics for a  $\chi^2$  independence test are presented, and categories in which more families were found for any of the three classes are presented in red, and those in which less families were found are in blue according to a Haberman residual analysis.

| Realm                          | poor | predicted | high | Total |
|--------------------------------|------|-----------|------|-------|
| $(\chi^2 = 53.97, P < 0.0001)$ |      |           |      |       |
| Afrotropic                     | 18   | 11        | 0    | 29    |
| Australasia                    | 19   | 5         | 1    | 25    |
| Indomalayan                    | 2    | 5         | 0    | 7     |

|                    |    |     |    |     |
|--------------------|----|-----|----|-----|
| <b>Nearctic</b>    | 4  | 7   | 0  | 11  |
| <b>Neotropic</b>   | 22 | 84  | 6  | 112 |
| <b>Oceania</b>     | 0  | 1   | 0  | 1   |
| <b>Palaearctic</b> | 10 | 48  | 5  | 63  |
| <b>Total</b>       | 75 | 161 | 12 | 248 |

**Table S15.** Frequency poor, predicted, and high species richness based on strict consensus tabulated by biome number. Statistics for a  $\chi^2$  independence test are presented, and categories in which more families were found for any of the three classes are presented in red, and those in which less families were found are in blue according to a Haberman residual analysis.

| Biome                           | poor | predicted | high | Total |
|---------------------------------|------|-----------|------|-------|
| $(\chi^2 = 144.88, P < 0.0001)$ |      |           |      |       |
| <b>1</b>                        | 7    | 1         | 0    | 8     |
| <b>2 to 4</b>                   | 43   | 10        | 0    | 53    |
| <b>5 to 7</b>                   | 14   | 16        | 0    | 30    |
| <b>8 to 10</b>                  | 9    | 44        | 0    | 53    |
| <b>11 to 13</b>                 | 2    | 50        | 3    | 55    |
| <b>14</b>                       | 0    | 40        | 9    | 49    |
| <b>Total</b>                    | 75   | 161       | 12   | 248   |

**Table S16.** Frequency poor, predicted, and high species richness based on majority consensus tabulated by biome presence. Statistics for a  $\chi^2$  independence test are presented, and categories in which more families were found for any of the three classes are presented in red, and those in which less families were found are in blue according to a Haberman residual analysis.

| Biome                                                                   | poor | predicted | high | Total |
|-------------------------------------------------------------------------|------|-----------|------|-------|
| $(\chi^2 = 58.45, P = 0.0003)$                                          |      |           |      |       |
| <b>Boreal Forests/Taiga</b>                                             | 3    | 66        | 9    | 78    |
| <b>Deserts &amp; Xeric Shrublands</b>                                   | 30   | 147       | 12   | 189   |
| <b>Flooded Grasslands &amp; Savannas</b>                                | 12   | 114       | 12   | 138   |
| <b>Mangroves</b>                                                        | 20   | 140       | 12   | 172   |
| <b>Mediterranean Forests, Woodlands &amp; Scrub</b>                     | 23   | 106       | 11   | 140   |
| <b>Montane Grasslands &amp; Shrublands</b>                              | 24   | 152       | 12   | 188   |
| <b>Temperate Broadleaf &amp; Mixed Forests</b>                          | 36   | 119       | 12   | 167   |
| <b>Temperate Conifer Forests</b>                                        | 18   | 113       | 12   | 143   |
| <b>Temperate Grasslands, Savannas &amp; Shrublands</b>                  | 16   | 93        | 12   | 121   |
| <b>Tropical &amp; Subtropical Coniferous Forests</b>                    | 16   | 136       | 12   | 164   |
| <b>Tropical &amp; Subtropical Dry Broadleaf Forests</b>                 | 27   | 149       | 12   | 188   |
| <b>Tropical &amp; Subtropical Grasslands, Savannas &amp; Shrublands</b> | 35   | 149       | 12   | 196   |
| <b>Tropical &amp; Subtropical Moist Broadleaf Forests</b>               | 55   | 161       | 12   | 228   |
| <b>Tundra</b>                                                           | 2    | 49        | 10   | 61    |
| <b>Total</b>                                                            | 317  | 1694      | 162  | 2173  |

**Table S17.** Frequency poor, predicted, and high species richness based on strict consensus tabulated by primary biome presence. Statistics for a  $\chi^2$  independence test are presented, and categories in which more families were found for any of the three classes are presented in red, and those in which less families were found are in blue according to a Haberman residual analysis.

| Biome                                                                   | poor | predicted | high | Total |
|-------------------------------------------------------------------------|------|-----------|------|-------|
| $(\chi^2 = 22.03, P = 0.6058)$                                          |      |           |      |       |
| <b>Boreal Forests/Taiga</b>                                             | 1    | 0         | 0    | 1     |
| <b>Deserts &amp; Xeric Shrublands</b>                                   | 7    | 4         | 0    | 11    |
| <b>Mangroves</b>                                                        | 1    |           | 0    | 1     |
| <b>Mediterranean Forests, Woodlands &amp; Scrub</b>                     | 7    | 13        | 1    | 21    |
| <b>Montane Grasslands &amp; Shrublands</b>                              | 2    | 1         | 0    | 3     |
| <b>Temperate Broadleaf &amp; Mixed Forests</b>                          | 18   | 34        | 5    | 57    |
| <b>Temperate Conifer Forests</b>                                        | 0    | 3         | 0    | 3     |
| <b>Temperate Grasslands, Savannas &amp; Shrublands</b>                  | 1    | 0         | 0    | 1     |
| <b>Tropical &amp; Subtropical Dry Broadleaf Forests</b>                 | 1    | 2         | 0    | 3     |
| <b>Tropical &amp; Subtropical Grasslands, Savannas &amp; Shrublands</b> | 4    | 4         | 0    | 8     |
| <b>Tropical &amp; Subtropical Moist Broadleaf Forests</b>               | 33   | 100       | 6    | 139   |
| <b>Total</b>                                                            | 75   | 161       | 12   | 248   |

## References

- BELL, C. D., SOLTIS, D. E. & SOLTIS, P. S. 2010. The age and diversification of the angiosperms re-revisited. *American Journal of Botany*, 97, 1296-1303.
- BOKMA, F. 2003. Testing for equal rates of cladogenesis in diverse taxa. *Evolution*, 57, 2469-2474, 6.
- HERNÁNDEZ-HERNÁNDEZ, T. & WIENS, J. J. 2020. Why Are There So Many Flowering Plants? A Multiscale Analysis of Plant Diversification. *The American Naturalist*, 195, 948-963.
- LI, H.-T., YI, T.-S., GAO, L.-M., MA, P.-F., ZHANG, T., YANG, J.-B., GITZENDANNER, M. A., FRITSCH, P. W., CAI, J., LUO, Y., WANG, H., VAN DER BANK, M., ZHANG, S.-D., WANG, Q.-F., WANG, J., ZHANG, Z.-R., FU, C.-N., YANG, J., HOLLINGSWORTH, P. M., CHASE, M. W., SOLTIS, D. E., SOLTIS, P. S. & LI, D.-Z. 2019. Origin of angiosperms and the puzzle of the Jurassic gap. *Nature Plants*, 5, 461-470.
- RAMÍREZ-BARAHONA, S., SAUQUET, H. & MAGALLÓN, S. 2020. The delayed and geographically heterogeneous diversification of flowering plant families. *Nature Ecology & Evolution*, 4, 1232-1238.
- REYES, E., SAUQUET, H. & NADOT, S. 2016. Perianth symmetry changed at least 199 times in angiosperm evolution. *TAXON*, 65, 945-964.
- STEVENS, P. F. 2021. *Angiosperm phylogeny website, version 14* [Online]. Available: <http://www.mobot.org/MOBOT/research/APweb/>. [Accessed].
- VAMOSI, J. C. & VAMOSI, S. M. 2011. Factors influencing diversification in angiosperms: At the crossroads of intrinsic and extrinsic traits. *American Journal of Botany*, 98, 460-471.
- WIKSTRÖM, N., SAVOLAINEN, V. & CHASE, M. W. 2001. Evolution of the angiosperms: calibrating the family tree. *Proceedings of the Royal Society of London, Series B*, 268, 2211-2220.
